# Supplementary material for: Deep learning-based reduced order models in cardiac electrophysiology
Source: PubMed Central journal article supplement (PMC7529269; doi:10.1371/journal.pone.0239416), 2020-10-01
Supplement: pone.0239416.s002.pdf [file pone.0239416.s002.pdf]

# Deep learning-based reduced order models in cardiac electrophysiology

Stefania Fresca<sup>1\*</sup>, Andrea Manzoni<sup>1</sup>, Luca Dedé<sup>1</sup>, Alfio Quarteroni<sup>1,2</sup>

**1** MOX - Dipartimento di Matematica, Politecnico di Milano, Milano, Italy

**2** Mathematics Institute, École Polytechnique Fédérale de Lausanne, Lausanne, Switzerland

\* stefania.fresca@polimi.it

## S2 Appendix.

**DL-ROM neural network architecture.** Here we report the configuration of the DL-ROM neural network used for our numerical tests. We employ a 12-layers DFNN equipped with 50 neurons per hidden layer and  $n$  neurons in the output layer, where  $n$  corresponds to the dimension of the reduced nonlinear trial manifold. The architectures of the encoder and decoder functions are instead reported in Table 1 and 2.

| Layer | Input dimension | Output dimension | Kernel size | # of filters | Stride | Padding |
|-------|-----------------|------------------|-------------|--------------|--------|---------|
| 1     |                 |                  | [5, 5]      | 8            | 1      | SAME    |
| 2     |                 |                  | [5, 5]      | 16           | 2      | SAME    |
| 3     |                 |                  | [5, 5]      | 32           | 2      | SAME    |
| 4     |                 |                  | [5, 5]      | 64           | 2      | SAME    |
| 5     | $N$             | 256              |             |              |        |         |
| 6     | 256             | $n$              |             |              |        |         |

**Table 1.** Attributes of convolutional and dense layers in the encoder  $\mathbf{f}_n^E$ .

| Layer | Input dimension | Output dimension | Kernel size | # of filters | Stride | Padding |
|-------|-----------------|------------------|-------------|--------------|--------|---------|
| 1     | $n$             | 256              |             |              |        |         |
| 2     | 256             | $N$              |             |              |        |         |
| 3     |                 |                  | [5, 5]      | 64           | 2      | SAME    |
| 4     |                 |                  | [5, 5]      | 32           | 2      | SAME    |
| 5     |                 |                  | [5, 5]      | 16           | 2      | SAME    |
| 6     |                 |                  | [5, 5]      | 1            | 1      | SAME    |

**Table 2.** Attributes of dense and transposed convolutional layers in the decoder  $\mathbf{f}^D$ .
