# Supplementary material for: Deep learning-based reduced order models in cardiac electrophysiology
Source: PubMed Central journal article supplement (PMC7529269; doi:10.1371/journal.pone.0239416), 2020-10-01
Supplement: pone.0239416.s003.pdf [file pone.0239416.s003.pdf]

# Deep learning-based reduced order models in cardiac electrophysiology

Stefania Fresca<sup>1\*</sup>, Andrea Manzoni<sup>1</sup>, Luca Dedé<sup>1</sup>, Alfio Quarteroni<sup>1,2</sup>

**1** MOX - Dipartimento di Matematica, Politecnico di Milano, Milano, Italy

**2** Mathematics Institute, École Polytechnique Fédérale de Lausanne, Lausanne, Switzerland

\* stefania.fresca@polimi.it

## S1 File.

**Features maps.** Here we report the feature maps of the DL-ROM neural network. In Figs 1 we show the feature maps of the first convolutional layer of the encoder function  $\sigma_1(W_1^k * \mathbf{u}^1(\boldsymbol{\mu}_{test}) + b_1^k)$ , for  $k = 1, \dots, 8$ , in the DL-ROM neural network when the FOM solution for the testing-parameter instances  $\boldsymbol{\mu}_{test} = (3.75, 3.75)$  cm and  $\boldsymbol{\mu}_{test} = (6.25, 6.25)$  cm at  $t = 0.2$  ms, are provided as inputs. At this stage, the feature maps retain most of the information present in the FOM solution. Moreover, by considering the two testing-parameter instances, we observe the translation equi-variance property [1] that convolutional layers hold when applied to the part of cardiac tissue corresponding to the scar. Moving to deeper layers, feature maps become increasingly abstract, and less visually interpretable; however, the extracted high-level features are still related both to the ischemic region and the electrical activation pattern.

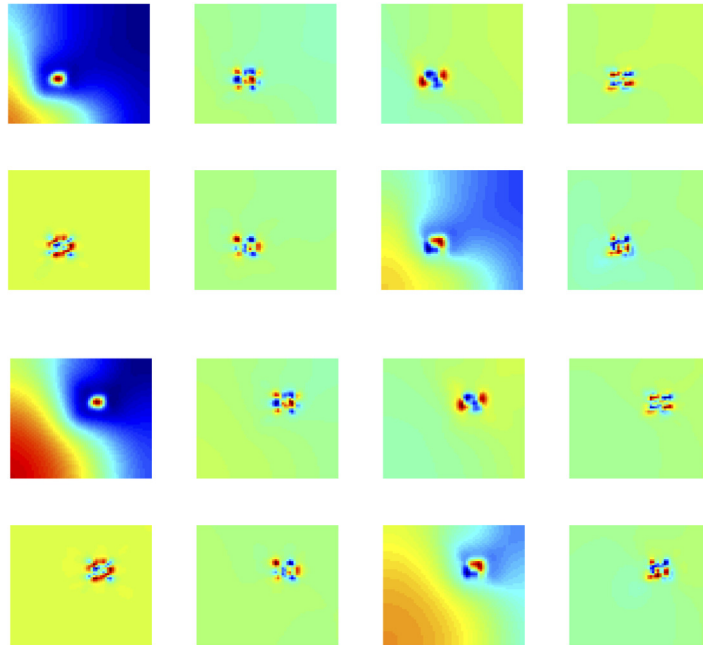

**Fig 1. Test 1: activations of the first convolutional layer of the encoder function for a testing-parameter instance.** Feature maps of the first convolutional layer of the encoder function in the DL-ROM neural network for the testing-parameter instances  $\boldsymbol{\mu}_{test} = (3.75, 3.75)$  cm (top) and  $\boldsymbol{\mu}_{test} = (6.25, 6.25)$  cm (bottom) at  $\tilde{t} = 0.2$  ms.

## References

1. Goodfellow I, Bengio Y, Courville A. Deep Learning. MIT Press; 2016. Available from: <http://www.deeplearningbook.org>.
