# Supplementary material for: Deep learning-based reduced order models in cardiac electrophysiology
Source: PubMed Central journal article supplement (PMC7529269; doi:10.1371/journal.pone.0239416), 2020-10-01
Supplement: pone.0239416.s004.pdf [file pone.0239416.s004.pdf]

# Deep learning-based reduced order models in cardiac electrophysiology

Stefania Fresca<sup>1\*</sup>, Andrea Manzoni<sup>1</sup>, Luca Dedé<sup>1</sup>, Alfio Quarteroni<sup>1,2</sup>

**1** MOX - Dipartimento di Matematica, Politecnico di Milano, Milano, Italy

**2** Mathematics Institute, École Polytechnique Fédérale de Lausanne, Lausanne, Switzerland

\* stefania.fresca@polimi.it

## S2 File.

**Fibers field distribution.** Here we show the resulting fibers distribution used for Test 3.

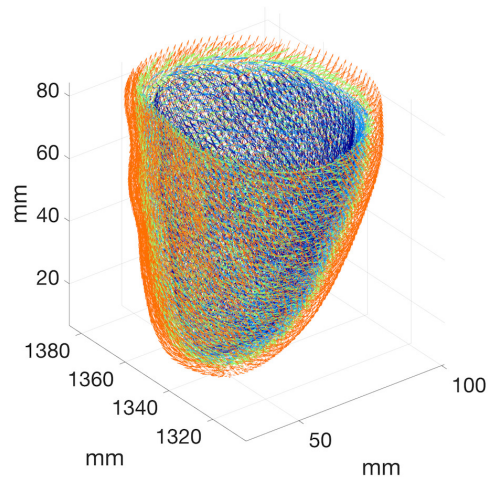

**Fig 1. Test 3: fibers distribution.** Fibers field on the Zygote LV geometry.
