# Supplementary material for: Deep learning-based reduced order models in cardiac electrophysiology
Source: PubMed Central journal article supplement (PMC7529269; doi:10.1371/journal.pone.0239416), 2020-10-01
Supplement: pone.0239416.s005.pdf [file pone.0239416.s005.pdf]

# Deep learning-based reduced order models in cardiac electrophysiology

Stefania Fresca<sup>1\*</sup>, Andrea Manzoni<sup>1</sup>, Luca Dedé<sup>1</sup>, Alfio Quarteroni<sup>1,2</sup>

**1** MOX - Dipartimento di Matematica, Politecnico di Milano, Milano, Italy

**2** Mathematics Institute, École Polytechnique Fédérale de Lausanne, Lausanne, Switzerland

\* stefania.fresca@polimi.it

## S3 File.

**Activation maps.** Here we show the ability of the DL-ROM approximation to replace the FOM solution when evaluating outputs of interest. For instance, in Fig 1 we show the FOM and DL-ROM activation maps, the latter obtained by choosing  $n = 10$  as DL-ROM dimension. Given the electric potential  $u = u(\mathbf{x}, t; \boldsymbol{\mu})$ , the (unipolar) activation map at a point  $\mathbf{x} \in \Omega$  is evaluated as the minimum time at which the AP peak reaches  $\mathbf{x}$ , that is,

$$AC(\mathbf{x}; \boldsymbol{\mu}) = \arg \min_{t \in (0, T)} \left( u(\mathbf{x}, t; \boldsymbol{\mu}) = \max_{t \in (0, T)} u(\mathbf{x}, t; \boldsymbol{\mu}) \right).$$

Here we compare the activation maps  $AC_{FOM}$  and  $AC_{DL-ROM}$  obtained through the FOM and the DL-ROM, respectively, by evaluating the maximum of the relative error

$$\epsilon_{AC}(\mathbf{x}; \boldsymbol{\mu}) = \frac{|AC_{FOM}(\mathbf{x}; \boldsymbol{\mu}) - AC_{DL-ROM}(\mathbf{x}; \boldsymbol{\mu})|}{|AC_{FOM}(\mathbf{x}; \boldsymbol{\mu})|}$$

over the  $N$  mesh points; in the case  $\mu_{test} = 12.9 \cdot 0.31$ , the maximum relative error is equal to  $4.32 \times 10^{-5}$ .

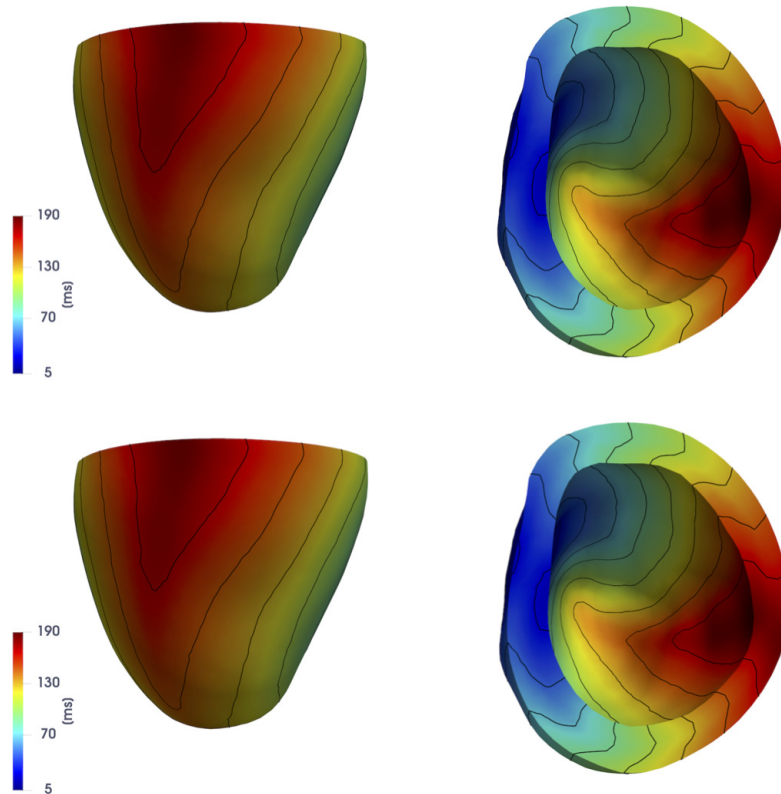

**Fig 1. Test 3. FOM and DL-ROM activation maps.** FOM (top) and DL-ROM (bottom) activation maps for the testing-parameter instance  $\mu_{test} = 12.9 \cdot 0.31 \text{ mm}^2/\text{ms}$  with  $n = 10$ .
